## RESEARCH ARTICLE

# *In situ* cardiac performance of Atlantic cod (*Gadus morhua*) at cold temperatures: long-term acclimation, acute thermal challenge and the role of adrenaline

Glenn J. Lurman<sup>1,\*</sup>, Lene H. Petersen<sup>2,†</sup> and A. Kurt Gamperl<sup>2,‡</sup>

<sup>1</sup>Alfred-Wegener-Institut für Polar- und Meeresforschung, PO Box 120161, 27515 Bremerhaven, Germany,

<sup>2</sup>Ocean Sciences Centre, Memorial University of Newfoundland, St John's, NL, Canada, A1C 5S7

\*Present address: Institute of Anatomy, University of Bern, Baltzerstrasse 2, CH-3012, Bern, Switzerland

†Present address: Department of Biology, University of North Texas, 1155 Union Circle, Denton, TX 76203, USA

‡Author for correspondence (kgamperl@mun.ca)

### SUMMARY

The resting and maximum *in situ* cardiac performance of Newfoundland Atlantic cod (*Gadus morhua*) acclimated to 10, 4 and 0°C were measured at their respective acclimation temperatures, and when acutely exposed to temperature changes: i.e. hearts from 10°C fish cooled to 4°C, and hearts from 4°C fish measured at 10 and 0°C. Intrinsic heart rate ( $f_H$ ) decreased from 41 beats min<sup>-1</sup> at 10°C to 33 beats min<sup>-1</sup> at 4°C and 25 beats min<sup>-1</sup> at 0°C. However, this degree of thermal dependency was not reflected in maximal cardiac output ( $Q_{max}$  values were ~44, ~37 and ~34 ml min<sup>-1</sup> kg<sup>-1</sup> at 10, 4 and 0°C, respectively). Further, cardiac scope showed a slight positive compensation between 4 and 0°C ( $Q_{10}=1.7$ ), and full, if not a slight over compensation between 10 and 4°C ( $Q_{10}=0.9$ ). The maximal performance of hearts exposed to an acute decrease in temperature (i.e. from 10 to 4°C and 4 to 0°C) was comparable to that measured for hearts from 4°C- and 0°C-acclimated fish, respectively. In contrast, 4°C-acclimated hearts significantly out-performed 10°C-acclimated hearts when tested at a common temperature of 10°C (in terms of both  $Q_{max}$  and power output). Only minimal differences in cardiac function were seen between hearts stimulated with basal (5 nmol l<sup>-1</sup>) versus maximal (200 nmol l<sup>-1</sup>) levels of adrenaline, the effects of which were not temperature dependent. These results: (1) show that maximum performance of the isolated cod heart is not compromised by exposure to cold temperatures; and (2) support data from other studies, which show that, in contrast to salmonids, cod cardiac performance/myocardial contractility is not dependent upon humoral adrenergic stimulation.

Key words: cod, heart, heart rate, cardiac output, temperature, adrenergic stimulation, catecholamines.

Received 3 January 2012; Accepted 13 August 2012

### INTRODUCTION

Temperature is a critical environmental factor that influences all life functions through changes in the rates of biochemical and physiological processes, and alterations in the stability of biological molecules. Consequently, the thermal tolerance range of aquatic organisms has been studied for decades (e.g. Brett, 1971; Fry, 1971; Beitinger et al., 2000; Pörtner, 2001), and there is accumulating evidence that: (1) the thermal tolerance of marine organisms (including fishes) is limited by blood oxygen transport and aerobic scope; and (2) at the limits of acclimation capacity, temperature-dependent constraints on these physiological processes translate into alterations in population dynamics and biogeography (Pörtner et al., 2001; Pörtner, 2002; Pörtner and Knust, 2007; Farrell, 2009; Pörtner, 2010; Eliason et al., 2011). Although it is difficult to determine the thermal limits of marine organisms under field conditions, studies on the influence of acclimation/acclimatization on physiological mechanisms/processes and thermal tolerance can be very insightful (Sokolova and Pörtner, 2003; Stillman, 2003; Seebacher et al., 2005; Franklin et al., 2007). For example, these latter authors reported that even archetypical stenothermal fish (e.g. the Antarctic fish *Pagothenia borchgrevinkii*) display considerable plasticity in cardiovascular and metabolic control, and swimming performance, as a result of temperature acclimation.

Based on the above, it is clear that additional research is needed on how acclimation temperature and thermal history influence the temperature limits of various fish species, and on what physiological processes mediate thermal tolerance. Thus, in this study, we used an *in situ* heart preparation to examine how acclimation to 10, 4 and 0°C as well as acute temperature changes (10 to 4°C, 4 to 10°C and 4 to 0°C) influence maximum cardiac performance in Atlantic cod. In our experiments, we chose temperatures below 10°C to examine the relationship between cardiac function and temperature because cod that inhabit the continental shelf off Atlantic Canada typically face water temperatures between 0.7 and 8°C (Lear, 1984; Clark and Green, 1991), and these temperatures span those used by Claireaux et al. (Claireaux et al., 2000) to examine the influence of acclimation temperature on cod aerobic scope. Our research complements previous work as there are currently no data on cod cardiac performance below 5°C. In addition, to our knowledge, only one study [A. P. Farrell, J. Altimiras, C. E. Franklin and M. Axelsson, unpublished; data presented in Axelsson (Axelsson, 2005)] has measured maximum cardiac performance/cardiac scope in a non-Antarctic teleost at temperatures of, or approaching, 0°C.

This study also addresses the role that circulating catecholamines play in regulating temperature-dependent cardiac performance in cod. Specifically, data on 10°C-acclimated Atlantic cod (Axelsson, 1988) suggest that adrenaline is not required for basal or maximum



Table 1. Morphometric data for all groups used to evaluate the effect of temperature and adrenaline concentration on Atlantic cod *in situ* cardiac function

| Acclimation temperature (°C) | 10          |             | 4           |             |             | 0           |
|------------------------------|-------------|-------------|-------------|-------------|-------------|-------------|
| Test temperature (°C)        | 10          | 4           | 10          | 4           | 0           | 0           |
| Mass (kg)                    | 0.60±0.03   | 0.54±0.03   | 0.54±0.03   | 0.59±0.02   | 0.49±0.10   | 0.56±0.17   |
| Length (cm)                  | 41.6±0.6    | 40.5±0.8    | 40.3±0.5    | 40.8±0.4    | 40.8±1.7    | 39.9±1.2    |
| Ventricle mass (g)           | 0.49±0.02   | 0.46±0.03   | 0.49±0.04   | 0.47±0.02   | 0.40±0.04   | 0.48±0.03   |
| Atrial mass (g)              | 0.154±0.011 | 0.123±0.008 | 0.133±0.008 | 0.133±0.008 | 0.123±0.017 | 0.117±0.006 |
| RVM (%)                      | 0.083±0.014 | 0.080±0.012 | 0.091±0.012 | 0.083±0.010 | 0.081±0.009 | 0.089±0.013 |
| RAM (%)                      | 0.026±0.003 | 0.023±0.004 | 0.025±0.003 | 0.023±0.002 | 0.025±0.006 | 0.022±0.004 |

Relative ventricular (RVM) and atrial mass (RAM) are presented as a percentage of body mass. All values are means ± s.e.m. No differences were identified between the groups for any parameter.  $N=7-10$  except hearts from 4°C-acclimated fish tested at 0°C, where  $N=4$ .

5 kPa. Then,  $P_{in}$  was left at 0.6 kPa and a maximum power output ( $PO_{max}$ ) test was performed by decreasing  $P_{out}$  to 2 kPa and increasing it in 1 kPa steps until 8 kPa. Following these initial  $Q_{max}$  and  $PO_{max}$  tests, the hearts were allowed to recover under resting conditions for 20 min. After this, the perfusate AD concentration was changed from 5 to 200 nmol l<sup>-1</sup>, and after 3 min, resting parameters were recorded and the  $Q_{max}$  and  $PO_{max}$  tests were repeated as described above. Finally, the hearts were removed from all fish so that ventricular mass and relative ventricular mass (RVM) and relative atrial mass (RAM) could be determined.

#### Data collection and analysis

Cardiac output was measured using a model T206 small animal blood flow meter in conjunction with a pre-calibrated in-line flow probe (2N, Transonic Systems, Ithaca, NY, USA). A Gould Statham pressure transducer (Model P23 ID, Oxnard, CA, USA) was used to measure  $P_{out}$ , and  $P_{in}$  was measured using a Grass pressure transducer (Model PT300, Warwick, RI, USA). Before the start of each experiment, the pressure transducers were calibrated against a static column of water, where zero pressure (0 cm H<sub>2</sub>O) was set at the saline level in the experimental bath (note: 1 cm H<sub>2</sub>O=0.098 kPa). Pressure and flow signals were collected at 20 Hz, and amplified and filtered using a Model MP100A-CE data acquisition system (BIOPAC Systems, Santa Barbara, CA, USA). The acquired signals were then analysed and stored using Acknowledge 3.7 software (BIOPAC Systems). Analysis included using pre-determined calibrations (Faust et al., 2004) to adjust  $P_{in}$  and  $P_{out}$  to account for the resistance in the tubing between the points of pressure measurement and the heart.

Cardiovascular performance was continuously measured throughout the experiment by measuring  $Q$ ,  $P_{in}$  and  $P_{out}$ .  $P_{in}$  was measured before each  $Q_{max}$  test in order to determine the input pressure required to obtain resting  $Q$ . Cardiac output, heart rate ( $f_H$ ), stroke volume, ( $V_S$ ) and  $P_{in}$  were also measured/calculated at each step of the  $Q_{max}$  and  $PO_{max}$  tests. Heart rate was calculated by measuring the number of systolic peaks during a 30 s interval. Cardiac output (ml min<sup>-1</sup> kg<sup>-1</sup>) and stroke volume (ml kg<sup>-1</sup>) were calculated as:

$$Q = Q / M \quad (1)$$

and

$$V_S = (Q / f_H) / M, \quad (2)$$

where  $M$  is fish mass (kg), and myocardial power output ( $PO$ ; mW g<sup>-1</sup> ventricle) was calculated as:

$$PO = [Q \times (P_{OUT} - P_{IN}) \times a] / M_V. \quad (3)$$

where  $P_{out}$  and  $P_{in}$  are output and input pressures (cm H<sub>2</sub>O), respectively,  $a$  (0.0016 mW min ml<sup>-1</sup> cm<sup>-1</sup> H<sub>2</sub>O) is a conversion factor to mW, and  $M_V$  is ventricular mass.

Statistical analysis was performed using SigmaStat 3.5 (Systat Software, Chicago, IL, USA). Two-way repeated-measures ANOVAs were used to test for the effects of temperature and adrenaline concentration, and Holm–Sidak *post hoc* tests were then used to examine differences between groups when main effects were significant ( $P < 0.05$ ). Values in the text, and those presented in figures and tables, are means ± 1 s.e.m.

## RESULTS

Acclimation temperature had no significant effect on cod ventricular or atrial mass, or RVM or RAM (RVM=0.080–0.091% and RAM=0.023–0.026%; Table 1).

### Effects of temperature

#### Cardiac performance at rest

Under resting conditions, with 5 nmol l<sup>-1</sup> AD, 10°C hearts (when acclimated to this temperature or acutely exposed to it) required a slightly positive  $P_{in}$  (0.004±0.020 kPa) to maintain the required resting  $Q$  of ~16 ml min<sup>-1</sup> kg<sup>-1</sup> (Table 2). This value was ~0.03 to 0.08 kPa higher than the negative input pressures required by 4°C hearts (again when acclimated or acutely challenged) to maintain resting  $Q$  or of the 0°C-acclimated hearts tested at this temperature (these hearts requiring the lowest input pressure, -0.11 kPa). Both  $Q$  and  $PO$  were significantly higher at 10°C than at 4 or 0°C, and at 4°C *versus* 0°C due to our manipulation of  $Q$  to reflect *in vivo* values at these different temperatures. These differences in  $Q$  were mirrored primarily by resting values for  $f_H$  (41.4 at 10°C, 33.2 at 4°C and 24.9 at 0°C), as  $V_S$  was not significantly different between the groups (range 0.33–0.4 ml kg<sup>-1</sup>).

#### Maximum cardiac performance

Acclimation temperature also had a significant effect on heart rate during the  $Q_{max}$  test, with heart rate falling from ~40.5 to 29.1 beats min<sup>-1</sup> between 10 and 0°C (Fig. 2A).  $Q_{max}$  decreased significantly with acclimation temperature (from approximately 44 to 34 ml min<sup>-1</sup> kg<sup>-1</sup>). However, the  $Q_{10}$  values for changes in  $Q_{max}$  with temperature were quite low (1.40, 1.25 and 1.34 for 10–4°C, 4–0°C and 10–0°C, respectively). This was because  $V_{Smax}$  increased slightly (i.e. from 1.15 and 1.30 ml kg<sup>-1</sup>), although not significantly ( $P=0.30$ ), between 10 and 0°C (Fig. 2B). Maximum power output of 10°C-acclimated hearts was 6.7 mW g<sup>-1</sup> (Fig. 3). Although  $PO_{max}$  was lower at both 4 (6.1 mW g<sup>-1</sup>) and 0°C (4.6 mW g<sup>-1</sup>), none of the values for  $PO_{max}$  were significantly different ( $P=0.12$ ).

An acute drop in temperature from 4 to 0°C had no effect on any of the measured maximum cardiovascular parameters, and only  $f_H$  changed significantly (decreasing by ~25%) when 10°C-acclimated hearts were tested at 4°C compared with 10°C (Figs 2, 3). In contrast,

Table 2. Input pressure ( $P_{in}$ ), heart rate ( $f_H$ ), stroke volume ( $V_S$ ), cardiac output ( $Q$ ) and power output ( $PO$ ) under resting conditions at 5 or 200 nmol l<sup>-1</sup> adrenaline (AD)

| Acclimation temperature (°C)                 | 10                     |                        | 4                          |                          | 10                       |                        | 4                          |                          | 0                        |                          |
|----------------------------------------------|------------------------|------------------------|----------------------------|--------------------------|--------------------------|------------------------|----------------------------|--------------------------|--------------------------|--------------------------|
|                                              | 5                      | 200                    | 5                          | 200                      | 5                        | 200                    | 5                          | 200                      | 5                        | 200                      |
| AD (nmol l <sup>-1</sup> )                   | 5                      | 200                    | 5                          | 200                      | 5                        | 200                    | 5                          | 200                      | 5                        | 200                      |
| $P_{in}$                                     | 0.004±0.020            | -0.008±0.018           | -0.036±0.022               | -0.039±0.025             | 0.004±0.027              | 0.002±0.044            | -0.084±0.039               | -0.073±0.033             | -0.007±0.030             | -0.001±0.033             |
| $f_H$ (beats min <sup>-1</sup> )             | 41.4±1.0 <sup>a</sup>  | 42.6±1.5 <sup>a</sup>  | 34.9±1.5 <sup>b</sup>      | 34.9±4.1 <sup>b</sup>    | 45.2±1.3 <sup>a</sup>    | 43.6±2.6 <sup>a</sup>  | 33.2±1.5 <sup>b</sup>      | 32.3±1.2 <sup>bc</sup>   | 27.0±2.9 <sup>c</sup>    | 26.6±1.8 <sup>c</sup>    |
| $V_S$ (ml kg <sup>-1</sup> )                 | 0.40±0.02              | 0.42±0.02              | 0.32±0.02*                 | 0.37±0.02                | 0.34±0.02*               | 0.41±0.02              | 0.31±0.02*                 | 0.39±0.02                | 0.34±0.03                | 0.35±0.03                |
| $Q$ (ml min <sup>-1</sup> kg <sup>-1</sup> ) | 16.3±0.1 <sup>a</sup>  | 18.0±0.7 <sup>a</sup>  | 10.8±0.6 <sup>b,*</sup>    | 12.9±0.7 <sup>b</sup>    | 15.6±2.2 <sup>a,*</sup>  | 17.5±3.6 <sup>a</sup>  | 10.2±0.1 <sup>b,*</sup>    | 12.5±0.9 <sup>b</sup>    | 8.8±0.1 <sup>b</sup>     | 9.1±0.7 <sup>c</sup>     |
| $PO$ (mW g <sup>-1</sup> ventricle)          | 2.75±0.13 <sup>a</sup> | 3.02±0.13 <sup>a</sup> | 2.08±0.11 <sup>a,b,*</sup> | 2.48±0.11 <sup>a,b</sup> | 2.88±0.14 <sup>a,*</sup> | 3.35±0.14 <sup>a</sup> | 1.83±0.13 <sup>b,c,*</sup> | 2.21±0.13 <sup>b,c</sup> | 1.51±0.18 <sup>b,c</sup> | 1.57±0.18 <sup>b,c</sup> |

$Q_{10}$  values for heart rate were 1.44 between 10 and 4°C, 2.05 between 4 and 0°C and 1.66 between 10 and 0°C for hearts tested at their acclimation temperature and with 5 nmol l<sup>-1</sup> AD. Values are means ± 1 s.e.m. Values with dissimilar letters are significantly different ( $P < 0.05$ ) within a particular adrenaline concentration. An asterisk (\*) indicates a significant difference between the 5 and 200 nmol l<sup>-1</sup> AD doses within each group.  $N = 7-10$  except hearts from 4°C-acclimated fish tested at 0°C, where  $N = 4$ .

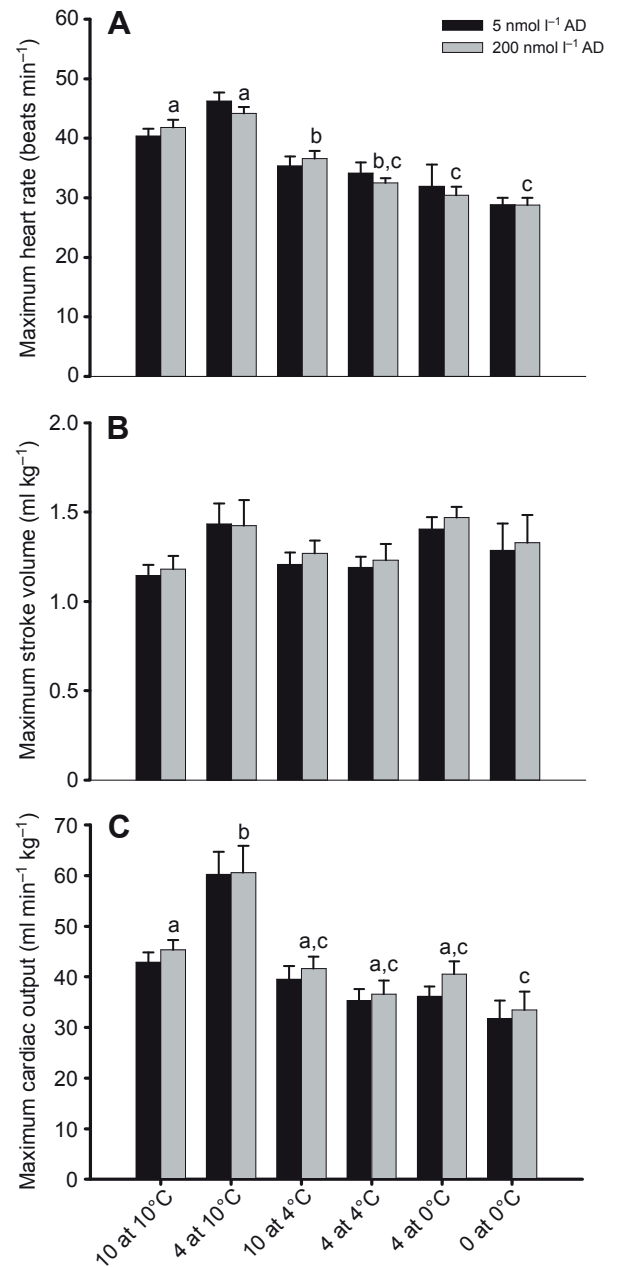

Fig. 2. Maximum values for heart rate (A), stroke volume (B) and cardiac output (C) for Atlantic cod hearts tested at their acclimation temperature (0, 4 and 10°C) and after an acute decrease or increase in temperature. Black bars indicate 5 nmol l<sup>-1</sup> AD, while grey bars indicate 200 nmol l<sup>-1</sup> AD in the perfusate. Groups without a letter in common are significantly different ( $P < 0.05$ ). Increasing the perfusate AD concentration did not significantly influence cardiac function in any group, although 200 nmol l<sup>-1</sup> AD had a slight, but significant, overall positive effect on cardiac output and stroke volume. Bars indicate +1 s.e.m.  $N = 7-10$  except hearts from 4°C-acclimated fish tested at 0°C, where  $N = 4$ .

the maximum performance of hearts from 4°C-acclimated cod increased dramatically when tested at 10°C. Heart rate was 40% higher,  $Q_{max}$  and  $PO_{max}$  increased by 65% (to 61 ml min<sup>-1</sup> kg<sup>-1</sup>) and 80% (to 10.9 mW g<sup>-1</sup>), respectively, and this substantial enhancement in pumping capacity resulted in both of these latter parameters being significantly higher (by 37 and 50%, respectively) compared with hearts from 10°C-acclimated fish when tested at 10°C. Interestingly, these increases in maximum pumping capacity were not associated



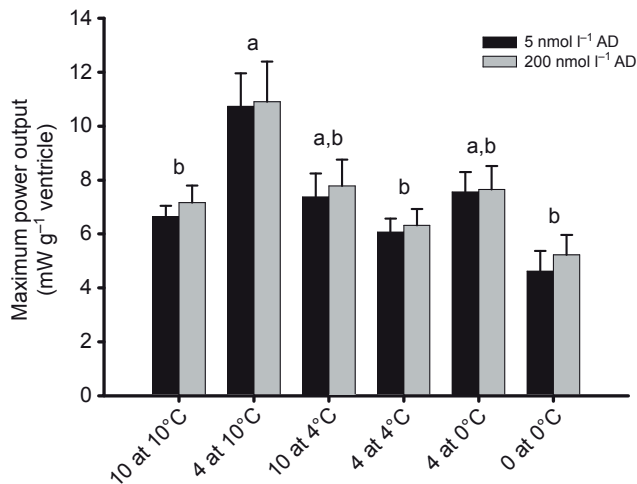

Fig. 3. Maximum power output ( $PO_{max}$ ) for Atlantic cod hearts tested at their acclimation temperature (0, 4 and 10°C) and after an acute decrease or increase in temperature (e.g. 4 at 10°C indicates hearts from 4°C-acclimated fish that were tested at 10°C). Black bars indicate 5 nmol l<sup>-1</sup> AD, while grey bars indicate 200 nmol l<sup>-1</sup> AD in the perfusate. Groups without a letter in common are significantly different ( $P < 0.05$ ). Increasing the perfusate AD concentration did not significantly influence cardiac function in any group. Bars indicate +1 s.e.m.  $N = 7-10$  except hearts from 4°C-acclimated fish tested at 0°C, where  $N = 4$ .

with statistically significant changes in  $V_S$  (although mean  $V_S$  was 25% higher in 4°C-acclimated fish; see Fig. 2B), or in the shape or position of the relationships between  $PO$  or  $Q$  and  $P_{out}$  (Fig. 4). Maximum values for power output were recorded between 5 and 6 kPa of diastolic pressure, and  $Q$  values for hearts from 4°C-acclimated cod tested at 10°C were substantially higher compared with all other groups at all values of  $P_{out}$ .

#### Adrenergic effects

Increasing the adrenaline concentration from 5 to 200 nmol l<sup>-1</sup> generally had a positive inotropic effect on hearts tested under 'resting' levels of performance at 10 and 4°C, with  $Q$ ,  $V_S$  and  $PO$  significantly or noticeably increased by ~10–20% at the higher concentration. However, no such stimulatory effect of the high adrenaline dose was observed in hearts tested at 0°C (Table 2), and  $f_H$  was unaffected by the 200 nmol l<sup>-1</sup> AD dose at any temperature. A marginally positive effect of 200 nmol l<sup>-1</sup> AD on heart function was also observed when comparing maximum cardiac performance ( $Q_{max}$ ,  $V_{Smax}$  and  $PO_{max}$ ) using the overall model ( $P = 0.009$ , 0.03 and 0.05, respectively; see Figs 2, 3). However, *post hoc* Holm–Sidak *t*-tests did not reveal any significant effects of increased (200 versus 5 nmol l<sup>-1</sup>) adrenaline on maximum cardiac parameters between groups at any of the acclimation/test-temperature combinations.

#### DISCUSSION

The  $f_H$  of *in situ* hearts from 10°C-acclimated cod was 41 beats min<sup>-1</sup> at 10°C, and maximum  $Q$  and  $V_S$  were 44 ml min<sup>-1</sup> kg<sup>-1</sup> and 1.14 ml kg<sup>-1</sup>, respectively. This heart rate is substantially higher than that measured *in vivo* at 10°C after extended (1 week) recovery from surgery [28 beats min<sup>-1</sup> (Webber et al., 1998)]. However, this difference was not unexpected given that the cholinergic tonus (37%) on the cod heart at 10°C is greater than the adrenergic tonus (21%) (Axelsson et al., 1998), and all nervous tone is eliminated in the *in situ* heart preparation. The reported  $Q_{max}$  and  $V_{Smax}$  also correspond

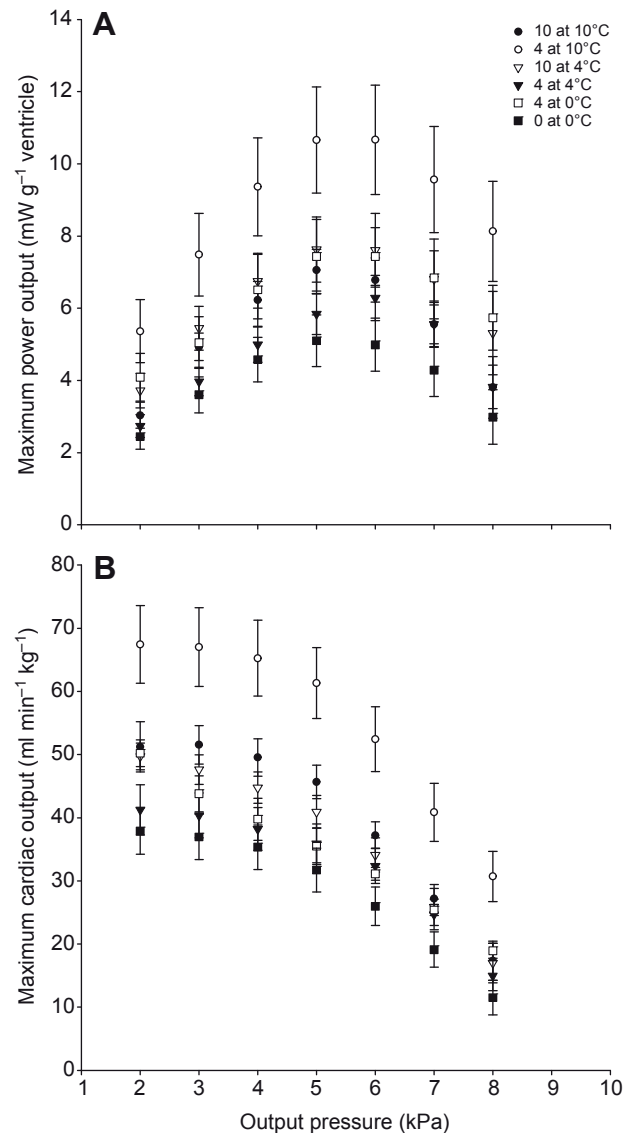

Fig. 4. Power (A) and cardiac (B) output for Atlantic cod hearts during the maximum power output test. Hearts were tested at their acclimation temperature (0, 4 and 10°C) and after an acute decrease or increase in temperature (e.g. 4 at 10°C indicates hearts from 4°C-acclimated fish that were tested at 10°C). In the maximum power output test, input pressure was maintained at 6 kPa, and diastolic output pressure was increased from 2 to 8 kPa. These data were obtained using 5 nmol l<sup>-1</sup> AD. Note: Increasing the perfusate AD concentration to 200 nmol l<sup>-1</sup> had no significant effect on either parameter, or on the shapes of the curves. At all  $P_{out}$  values, cardiac and power output for the 4°C-acclimated fish tested at 10°C were significantly higher than all other groups. Bars indicate  $\pm 1$  s.e.m.  $N = 7-10$  except hearts from 4°C-acclimated fish tested at 0°C, where  $N = 4$ .

well with *in vivo* data for this species. Petersen and Gamperl (Petersen and Gamperl, 2010) reported values for  $Q_{max}$  and  $V_{Smax}$  of 44.5 ml min<sup>-1</sup> kg<sup>-1</sup> and 0.99 ml kg<sup>-1</sup> in cod swimming at their critical swimming speed (1.50 body lengths s<sup>-1</sup>) at 10°C, while cod swimming at 0.7 m s<sup>-1</sup> had a  $Q$  of 35 ml min<sup>-1</sup> kg<sup>-1</sup> (Webber et al., 1998). The close association between *in situ* and *in vivo* cardiac function in this species, is very similar to that for the rainbow trout (Claireaux et al., 2005), and further validates this preparation for studies of cardiac function in fishes.

### Temperature effects on cardiac function

Cardiac hypertrophy is often associated with cold-acclimation/adaptation (Driedzic et al., 1996; Farrell, 1996; Axelsson et al., 1998; Aho and Vornanen, 2001), and has been previously reported to occur in Atlantic cod. Foster et al. (Foster et al., 1993) showed that the RVM of juvenile cod acclimated to 5°C for 43 days was 24% greater than for 15°C-acclimated fish. This latter result differs from this study where no difference in RVM was found between cod acclimated to temperatures between 0 and 10°C (Table 1). This discrepancy may be due to the age of the fish used in the two studies (juvenile *versus* adult), or the range of acclimation temperatures utilised (0–10°C *versus* 5 and 15°C). Nonetheless, this is not the first study to report that RVM does not increase with cold acclimation. Heart size did not change in the white bass (*Morone americana*) or yellow perch (*Perca flavescens*) when exposed to cold temperatures (Sephton and Driedzic, 1991). Although many studies report that RVM increases in rainbow trout at cold temperatures (e.g. Farrell et al., 1988; Graham and Farrell, 1989), Sephton and Driedzic (Sephton and Driedzic, 1995) did not observe any increase in heart size when trout were acclimated to 5°C for 4 weeks.

A clear effect of acclimation temperature was seen on intrinsic heart rate at rest, with  $Q_{10}$  values of 1.44, 2.05 and 1.66 between 10 and 4°C, 4 and 0°C, and 10 and 0°C, respectively. These results suggest that there was partial compensation of  $f_H$  between 10 and 4°C, but not as temperature fell further. The effect of acclimation temperature on  $f_H$  of the *in situ* cod heart is consistent with data for the rainbow trout and sea raven (*Hemirhamphus americanus*). The  $Q_{10}$  value for trout hearts acclimated to 15 and 5°C and perfused with 5 nmol l<sup>-1</sup> AD was 1.32 (Graham and Farrell, 1989), whereas sea raven hearts tested at 12–14°C *versus* 2–3°C had a  $Q_{10}$  for  $f_H$  of ~1.81 (Graham and Farrell, 1985). Collectively, these results suggest that the acclimation/acclimatization capacity of pacemaker cells and/or mechanisms that determine the kinetics of myocardial contraction are limited in temperate teleosts at temperatures near their lower thermal limit.

While acclimation temperature had a substantial effect on resting  $f_H$ , its influence on  $Q_{max}$  and  $PO_{max}$  was not as great.  $Q_{max}$  was not different between 10 and 4°C and only fell by 8.5% between 4 and 0°C ( $Q_{10}=1.25$ ), and acclimation temperature had no significant effect on  $PO_{max}$  (Figs 2, 3). Further, cardiac scope showed a slight positive compensation between 4 and 0°C ( $Q_{10}=1.7$ ), and a full, if not slight over compensation between 10 and 4°C ( $Q_{10}=0.9$ ; Fig. 5). The ability of the Atlantic cod heart to largely compensate for the effects of temperature on  $Q_{max}$  and  $PO_{max}$  was due to the heart's ability to maintain, or slightly increase,  $V_{Smax}$  at the two colder acclimation temperatures (Fig. 2B). These results suggest that acclimation to cold temperatures does not have a negative impact on the intrinsic mechanical properties of the cod myocardium. This finding is in contrast to studies on most other teleosts. Sea raven acclimated to 2–3°C had a maximum stroke volume 20% lower than measured in fish acclimated to 12–14°C (Graham and Farrell, 1985). When the increase in ventricular mass in 5°C- *versus* 15°C-acclimated rainbow trout is taken into account,  $V_{Smax}$  (ml g<sup>-1</sup> ventricle) was ~50% lower in fish acclimated to the lower temperature (Graham and Farrell, 1989). Finally, the pumping capacity of hearts from 5°C-acclimated carp (*Carassius carassius*) was only approximately one-third of that observed at 15°C (Matikainen and Vornanen, 1992).

Further evidence that the cod heart is well adapted to, and has considerable capacity for thermal compensation at, cold temperatures comes from the acute temperature change experiments: (1) both groups of hearts that experienced drops in temperature (from 10 to

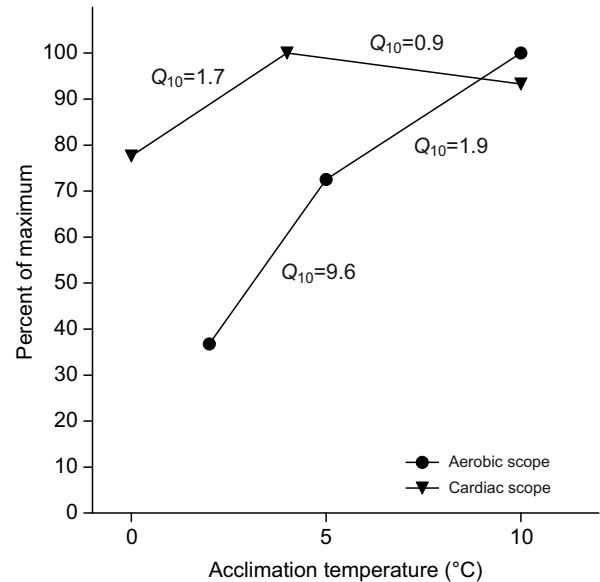

Fig. 5. Atlantic cod aerobic and cardiac scope as a function of acclimation temperature. Aerobic scope (net aerobic scope) calculated from Claireaux et al. (Claireaux et al., 2000). All data are normalised to the maximum value that was reported over the presented temperature range.

4°C and 4 to 0°C) had values of  $Q_{max}$  and  $PO_{max}$  that were equivalent to or slightly higher than measured in hearts acclimated to the lower temperature; and (2) hearts acclimated at 4°C but tested at 10°C had values for these two variables that far exceeded (by 37 and 50%, respectively) those measured in hearts from 10°C-acclimated fish (Figs 2, 3). Indeed, both these results are remarkable based on data for the majority of teleost species examined under similar experimental conditions. For example, *in situ*  $Q_{max}$  and  $PO_{max}$  were ~40–45% lower when hearts from summer-acclimated (12–14°C) sea raven were tested at 3.3°C, and 20 and 35% lower, respectively, in winter-acclimated (2–3°C) than summer-acclimated fish when tested at 13°C (Graham and Farrell, 1985). The maximum contractile force developed by the hearts of 4°C-acclimated rainbow trout was reduced by 60% when fish were acutely exposed to 10°C without AD, and 20% lower even when 100 nmol l<sup>-1</sup> AD was added (Aho and Vornanen, 2001). The maximum isometric tension and pumping capacity of the burbot (*Lota lota*, another member of the family Gadidae) heart are maximum when acclimated to 1°C, but decrease precipitously when exposed to an acute increase in temperature (Tiitu and Vornanen, 2002). Finally, even in winter-active freshwater species (e.g. yellow perch and smallmouth bass, *Micropterus dolomieu*), where positive thermal compensation in contractile force has been reported, this effect is only seen at low contraction/pacing frequencies (<30 min<sup>-1</sup>) (Bailey and Driedzic, 1990). In the present study, hearts from 4°C-acclimated cod were able to maintain or increase  $V_{Smax}$  in contrast to 10°C-acclimated fish, even though their intrinsic  $f_H$  at 10°C exceeded 45 beats min<sup>-1</sup> (see Fig. 2B). It is unlikely, however, that the cod heart's ability to pump at or near maximal levels when chronically or acutely exposed to temperatures at the lower end of its thermal range is unique amongst temperate marine teleosts. Axelsson et al. (A. P. Farrell, J. Altimiras, C. E. Franklin and M. Axelsson, unpublished) [see fig. 6.4 in Axelsson (Axelsson, 2005)] showed that cardiac scope of the eurythermal sculpin (*Myoxocephalus scorpius*) exposed to an acute temperature increase from 1 to 10°C is 1.6-fold that measured in fish held at 1°C.

The ability of the cod heart to largely compensate for chronic and acute decreases in temperature, and to elevate performance when exposed to an acute increase in temperature from 4 to 10°C, must be predicated on aspects of cardiac and myocardial physiology. In this study, we did not investigate how cellular and molecular mechanisms important in myocardial plasticity and performance were affected by the imposed temperature regimes. However, we speculate that considerable remodelling of both the mechanical and electrical properties of the cod heart is probably involved in its superior cold performance. These alterations could include a prolonged action potential (Haverinen and Vornanen, 2008; Galli et al., 2009) and an enhancement of sarcolemmal  $\text{Na}^+$  current ( $I_{\text{Na}}$ ) that augments  $\text{Ca}^{2+}$  influx through  $\text{Na}^+/\text{Ca}^{2+}$  exchange (Haverinen and Vornanen, 2004). Further, the cod heart is rare amongst teleosts in that the force–frequency relationship is flat or positive over the range of  $f_{\text{H}}$  measured in this study, and this phenomenon can be eliminated by ryanodine [see fig. 7D in Driedzic and Gesser (Driedzic and Gesser, 1988)]. These latter data suggest that aspects of sarcoplasmic reticulum (SR) function may play a major role in enabling the *in situ* cod heart to maintain performance over a range of temperatures and to elevate performance when exposed to an acute increase in temperature. Indeed, this hypothesis has significant support in the literature. Several studies have shown that SR function is augmented in cold-acclimated or -resident species, and that SR  $\text{Ca}^{2+}$  cycling offers a mechanism for thermal plasticity in fish hearts (Aho and Vornanen, 1998; Aho and Vornanen, 1999; Shiels et al., 2006; Shiels et al., 2011). Tiitu and Vornanen (Tiitu and Vornanen, 2002) reported that excitation coupling of burbot hearts was more dependent on SR function after an acute temperature increase to 7°C than it was at the 1°C acclimation temperature.

Our data for cod *in situ* cardiac function suggest that this species should be able to maintain its performance capacity at cold temperatures, and when it encounters marked seasonal or diel temperature variations (e.g. D'Amours, 1993; Godø and Michalsen, 2000; Righton et al., 2010). However, this conclusion is in contrast to that reported for the effects of temperature on cod swimming and metabolic performance. Sylvestre et al. (Sylvestre et al., 2007) reported that cod swimming performance and metabolic capacity were reduced significantly (by 20–25%) following a short-term (over 2 days) drop in temperature from 7 to 3°C. Lurman et al. (Lurman et al., 2009) found that acclimation temperature (4 *versus* 10°C) had no or minimal effects on the active (maximum) metabolic rate and critical swimming speed of cod when tested at either temperature, but that these variables were significantly (10–20%) lower in both groups when tested at the other temperature. Finally, although cardiac scope changed little (i.e. by <20%) when our cod were acclimated to temperatures of 0, 4 and 10°C (present study), Claireaux et al. (Claireaux et al., 2000) showed that metabolic scope of the Atlantic cod decreased by 28% between 10 and 5°C and a further 48% between 5 and 2°C (Fig. 5). The large discrepancy between the effects of temperature on cod cardiac *versus* aerobic scope is an unexpected finding given the excellent relationship between cardiac output and oxygen consumption reported for Atlantic cod (e.g. Webber et al., 1998; Gollock et al., 2006), and suggests that there may be situations, particularly large acute changes in temperature and cold temperatures, where the relationship between cardiac function and oxygen consumption breaks down and the capacity of fishes to utilise oxygen becomes the limiting factor. However, these results will need to be confirmed *in vivo* as the influence of temperature changes on extrinsic mechanisms that control/influence fish cardiac function are precluded when using *in situ* heart preparations.

### Cardiac function and adrenergic stimulation

In this study, we showed that high levels of AD had minimal effects on the resting or maximum *in situ* performance of the Atlantic cod heart (e.g. see Figs 2, 3). This result was not because the basal level of AD (5 nmol l<sup>-1</sup>) resulted in near-maximal cardiac stimulation or that the maximum level chosen (200 nmol l<sup>-1</sup>) was not physiological. A pilot study conducted with three cod hearts at 10°C compared the effects of no AD with both 5 and 200 nmol l<sup>-1</sup> AD, and showed little difference in performance between them (data not shown), and Gamperl and Genge (A.K.G. and A. G. Genge, unpublished data) found no observable differences in resting or maximum  $f_{\text{H}}$ ,  $Q$  or  $V_{\text{S}}$  in cod hearts treated with 7 nmol l<sup>-1</sup> AD *versus* those perfused with AD-free saline. Further, *in vivo* maximum post-stress plasma AD concentrations in the range of 100–300 nmol l<sup>-1</sup> have been reported for this species (Wahlqvist and Nilsson, 1980; Alzaid, 2012). Instead, in agreement with Axelsson (Axelsson, 1988), our results indicate that even maximum circulating catecholamine levels have little inotropic or chronotropic effect on the cod heart. These data are in sharp contrast to data on many teleosts, including salmonids, the eel (*Anguilla dieffenbachia*) and tunas, where this hormone causes large increases in the heart's pumping capacity and in myocardial force development (Graham and Farrell, 1989; Franklin and Davie, 1992; Gamperl et al., 1994; Shiels et al., 2003; Galli et al., 2009). However, the cod does not appear to be unique in having a very limited capacity to elevate cardiac performance in response to increases in circulating catecholamines. For example, Mendonça and Gamperl (Mendonça and Gamperl, 2009) showed that the winter flounder heart is not dependent upon adrenergic stimulation at rest, and only reported increases of 6% in  $V_{\text{S}}$  and 10% in  $Q$  following the simultaneous injection of 0.2 and 0.4  $\mu\text{g kg}^{-1}$  of AD and noradrenaline at 8°C, respectively. Maximum adrenergic stimulation (up to 500 nmol l<sup>-1</sup>) has no effect on either heart rate or maximum  $Q$ , and only a modest (10–15%) positive inotropic effect on power output of the *in situ* sea bass (*Dicentrarchus labrax*) heart at 18 and 22°C (Farrell et al., 2007). Finally, Lague et al. (Lague et al., 2012) report that AD and noradrenaline concentrations as high as  $5 \times 10^{-6}$  mol l<sup>-1</sup> have no effect on function of the 22°C *in situ* tilapia (*Oreochromis* hybrid) heart under conditions of normoxia, hypoxia or acidosis.

While this study did not investigate the mechanistic basis (or bases) behind the diminished sensitivity of cod heart function to adrenergic stimulation, there are several potential explanations. First,  $\text{B}_3$ -adrenoreceptors exist in the fish heart (Nikinmaa, 2003; Nickerson et al., 2003; Imbrogno et al., 2006) and may play a 'protective role' in some fish hearts (including the cod) by preventing excessive  $\beta_1/\beta_2$ -stimulation of the myocardium (Gauthier et al., 2007; Angelone et al., 2008). Second, catecholamine-induced sarcolemma  $\text{Ca}^{2+}$  influx varies between species, and may be somewhat independent of sarcolemma  $\text{Ca}^{2+}$  channel density. For example, Vornanen (Vornanen, 1998) showed that isoproterenol increased the basal  $\text{Ca}^{2+}$  current ( $I_{\text{Ca}}$ ) by ~2.3-fold in trout myocytes but only by 1.4-fold in crucian carp (*Carassius carassius*) cardiac cells, despite the fact that there is a higher density of myocardial  $\text{Ca}^{2+}$  channels in the latter species. Alternatively, Shiels et al. (Shiels et al., 2006) suggest that  $\text{Na}^+/\text{Ca}^{2+}$  exchange may be the primary pathway for sarcolemma  $\text{Ca}^{2+}$  influx in the cold stenothermal burbot. If a similar phenomenon operates at cold temperatures in the cod heart, this would largely preclude an inotropic response to adrenergic stimulation. Third, changes in cod cardiac function are much more dependent on alterations in cholinergic than adrenergic tonus (Axelsson, 1988; Altimiras et al., 1997), and several authors (Laurent et al., 1983; Axelsson and Nilsson, 1986; Fritsche and Nilsson, 1990; Altimiras et al., 1997) suggest that the teleost heart



is also controlled by a non-adrenergic non-cholinergic (NANC) tonus, which could be more important in the cod heart than in other teleosts. For instance, although nitric oxide generally results in negative chronotropy and inotropy, it has also been identified as an important NANC regulator of cardiac performance in teleosts (Imbrogno et al., 2001; Tota et al., 2005). This raises the possibility that the cod heart has a diminished adrenergic sensitivity to catecholamines because other systems play a predominant role in controlling cardiac function.

Although our results show that AD has very limited direct effects on the cod heart, this does not preclude this hormone from having a significant role in supporting cardiac function. In rainbow trout, AD increases venous tone through an  $\alpha$ -adrenergic dependent mechanism and decreases venous compliance (Sandblom and Axelsson, 2006; Zhang et al., 1998), and Sandblom et al. (Sandblom et al., 2005) showed that increases in mean circulatory filling pressure, central venous pressure and  $Q$  were abolished in swimming sea bass after  $\alpha$ -adrenoceptor blockade. These results suggest that  $\alpha$ -adrenergic stimulation of the cod's venous vasculature could mobilize venous blood, and increase cardiac preload and/or  $V_S$ .

### Conclusions

In this study, we show that the isolated adult cod heart can maintain its pumping capacity when challenged with acute temperature decreases, and that maximum cardiac function is only reduced slightly when this species is acclimated to temperatures as low as 0°C. This degree of thermal independence when faced with decreasing temperatures has not been reported previously for fish cardiac function, and is likely to be of considerable benefit to this fish, which can be exposed to subzero winter temperatures and to significant temperature changes during diel vertical migrations (Righton et al., 2010). What mechanisms mediate this plasticity in cardiac function are not known, but it is evident that: (1) alterations in adrenergic sensitivity and heart size are not involved; and (2) the capacity for modifications in myocardial excitability and contractility with temperature acclimation must be considerable given the large increases in  $Q_{\max}$  and  $PO_{\max}$  exhibited by hearts from 4°C-acclimated fish when tested at 10°C.

### LIST OF SYMBOLS AND ABBREVIATIONS

|             |                                           |
|-------------|-------------------------------------------|
| AD          | adrenaline                                |
| ARDF        | Aquaculture Research Development Facility |
| $f_H$       | heart rate                                |
| $I_{Ca}$    | calcium ion current                       |
| $I_{Na}$    | sodium ion current                        |
| NANC        | non-adrenergic non-cholinergic            |
| $P_{in}$    | input pressure                            |
| $PO$        | power output                              |
| $PO_{\max}$ | maximum power output                      |
| $P_{out}$   | output pressure                           |
| $Q$         | cardiac output                            |
| $Q_{10}$    | temperature quotient                      |
| $Q_{\max}$  | maximum cardiac output                    |
| RAM         | relative atrial mass                      |
| RVM         | relative ventricular mass                 |
| SR          | sarcoplasmic reticulum                    |
| $V_S$       | stroke volume                             |
| $V_{S\max}$ | maximum stroke volume                     |

### ACKNOWLEDGEMENTS

We thank Danny Boyce and the Atlantic Innovation Fund (AIF-ACOA) for providing the fish, the technical staff of the Ocean Sciences Centre for maintaining/repairing the temperature control equipment used in these studies, and Dr Holly Shiels for helpful discussions on cellular processes mediating cardiac functional plasticity.

### FUNDING

This research was funded by a Natural Sciences and Engineering Research Council of Canada (NSERC) Discovery Grant to A.K.G., by funds provided to G.J.L. by the German Academic Exchange Service (DAAD) and the Society for Experimental Biologists (SEB), and a Memorial University Graduate Fellowship to L.H.P.

### REFERENCES

- Aho, E. and Vornanen, M. (1998).  $Ca^{2+}$ -ATPase activity and  $Ca^{2+}$  uptake by sarcoplasmic reticulum in fish heart: effects of thermal acclimation. *J. Exp. Biol.* **201**, 525-532.
- Aho, E. and Vornanen, M. (1999). Contractile properties of atrial and ventricular myocardium of the heart of rainbow trout *Oncorhynchus mykiss*: effects of thermal acclimation. *J. Exp. Biol.* **202**, 2663-2677.
- Aho, E. and Vornanen, M. (2001). Cold acclimation increases basal heart rate but decreases its thermal tolerance in rainbow trout (*Oncorhynchus mykiss*). *J. Comp. Physiol. B* **171**, 173-179.
- Altimiras, J., Aissaoui, A., Tort, L. and Axelsson, M. (1997). Cholinergic and adrenergic tones in the control of heart rate in teleosts. How should they be calculated? *Comp. Biochem. Physiol.* **118**, 131-139.
- Alzaid, A. (2012). Stress-related and ontogenetic aspects of metabolic depression in cunner (*Tautoglabrus adspersus*). MSc thesis, Memorial University of Newfoundland, St John's, NL, Canada.
- Angelone, T., Filice, E., Quintieri, A. M., Imbrogno, S., Recchia, A., Pulerà, E., Mannarino, C., Pellegrino, D. and Cerra, M. C. (2008).  $\beta_3$ -Adrenoceptors modulate left ventricular relaxation in the rat heart via the NO-cGMP-PKG pathway. *Acta Physiol.* **192**, 1-11.
- Axelsson, M. (1988). The importance of nervous and humoral mechanisms in the control of cardiac performance in the Atlantic cod *Gadus morhua* at rest and during non-exhaustive exercise. *J. Exp. Biol.* **137**, 287-301.
- Axelsson, M. (2005). The circulatory system and its control. In *Fish Physiology*, Vol. 22 (ed. A. P. Farrell and J. F. Steffensen), pp. 239-280. New York: Academic Press.
- Axelsson, M. and Nilsson, S. (1986). Blood pressure control during exercise in the Atlantic cod, *Gadus morhua*. *J. Exp. Biol.* **126**, 225-236.
- Axelsson, M., Agnisola, C., Nilsson, S. and Tota, B. (1998). Fish cardio-circulatory function in the cold. In *Cold Ocean Physiology* (ed. H.-O. Pörtner and R. C. Playle), pp. 327-364. Cambridge: Cambridge University Press.
- Bailey, J. R. and Driedzic, W. R. (1990). Enhanced maximum frequency and force development of fish hearts following temperature acclimation. *J. Exp. Biol.* **149**, 239-254.
- Beitinger, T. L., Bennett, W. A. and McCauley, R. W. (2000). Temperature tolerance of North American freshwater fishes exposed to dynamic changes in temperature. *Environ. Biol. Fishes* **58**, 237-275.
- Brett, J. R. (1971). Energetic responses of salmon to temperature. A study of some thermal relations in the physiology and freshwater ecology of sockeye salmon (*Oncorhynchus nerka*). *Am. Zool.* **11**, 99-113.
- Claireaux, G., Webber, D. M., Lagardère, J.-P. and Kerr, S. R. (2000). Influence of water temperature and oxygenation on the aerobic metabolic scope of Atlantic cod (*Gadus morhua*). *J. Sea Res.* **44**, 257-265.
- Claireaux, G., McKenzie, D. J., Genge, A. G., Chatelier, A., Aubin, J. and Farrell, A. P. (2005). Linking swimming performance, cardiac pumping ability and cardiac anatomy in rainbow trout. *J. Exp. Biol.* **208**, 1775-1784.
- Clark, D. S. and Green, J. M. (1991). Seasonal variation in temperature preference of juvenile Atlantic cod (*Gadus morhua*), with evidence supporting an energetic basis of diel vertical migration. *Can. J. Zool.* **69**, 1302-1307.
- D'Amours, D. (1993). The distribution of cod (*Gadus morhua*) in relation to temperature and oxygen level in the Gulf of St. Lawrence. *Fish. Oceanogr.* **2**, 24-29.
- Driedzic, W. R. and Gesser, H. (1988). Differences in force-frequency relationships and calcium dependency between elasmobranch and teleost hearts. *J. Exp. Biol.* **140**, 227-241.
- Driedzic, W. R., Bailey, J. R. and Sephton, D. H. (1996). Cardiac adaptations to low temperature in non-polar teleost fish. *J. Exp. Zool.* **275**, 186-195.
- Eliason, E. J., Clark, T. D., Hague, M. J., Hanson, L. M., Gallagher, Z. S., Jeffries, K. M., Gale, M. K., Patterson, D. A., Hinch, S. G. and Farrell, A. P. (2011). Differences in thermal tolerance among sockeye salmon populations. *Science* **332**, 109-112.
- Farrell, A. P. (1996). Effects of temperature on cardiovascular performance. In *Global Warming: Implications of Freshwater and Marine Fish* (ed. C. M. Wood and D. G. McDonald), pp. 135-158. Cambridge: Cambridge University Press.
- Farrell, A. P. (2009). Environment, antecedents and climate change: lessons from the study of temperature physiology and river migration of salmonids. *J. Exp. Biol.* **212**, 3771-3780.
- Farrell, A. P., MacLeod, K. and Driedzic, W. R. (1982). The effects of preload, after load, and epinephrine on cardiac performance in the sea raven, *Hemirhamphus americanus*. *Can. J. Zool.* **60**, 3165-3171.
- Farrell, A. P., Hammons, A. M., Graham, M. S. and Tibbits, G. F. (1988). Cardiac growth in rainbow trout, *Salmo gairdneri*. *Can. J. Zool.* **66**, 2368-2373.
- Farrell, A. P., Axelsson, M., Altimiras, J., Sandblom, E. and Claireaux, G. (2007). Maximum cardiac performance and adrenergic sensitivity of the sea bass *Dicentrarchus labrax* at high temperatures. *J. Exp. Biol.* **210**, 1216-1224.
- Faust, H. A., Gamperl, A. K. and Rodnick, K. J. (2004). All rainbow trout (*Oncorhynchus mykiss*) are not created equal: intra-specific variation in cardiac hypoxia tolerance. *J. Exp. Biol.* **207**, 1005-1015.
- Foster, A. R., Hall, S. J. and Houlihan, D. F. (1993). The effects of temperature acclimation on organ/tissue mass and cytochrome c oxidase activity in juvenile cod (*Gadus morhua*). *J. Fish Biol.* **42**, 947-957.
- Franklin, C. E. and Davie, P. S. (1992). Myocardial power output of an isolated eel (*Anguilla dieffenbachii*) heart preparation in response to adrenaline. *Comp. Biochem. Physiol.* **101**, 293-298.



- Franklin, C. E., Davison, W. and Seebacher, F. (2007). Antarctic fish can compensate for rising temperatures: thermal acclimation of cardiac performance in *Pagothenia borchgrevinkii*. *J. Exp. Biol.* **210**, 3068-3074.
- Fritzsche, R. and Nilsson, S. (1990). Autonomic nervous control of blood pressure and heart rate during hypoxia in the cod, *Gadus morhua*. *J. Comp. Physiol. B* **160**, 287-292.
- Fry, F. E. (1971). The effect of environmental factors on the physiology of fish. In *Fish Physiology, Environmental Relations and Behaviour*, Vol. VI (ed. W. S. Hoar and D. J. Randall), pp. 1-98. New York: Academic Press.
- Galli, G. L. J., Shiels, H. A. and Brill, R. W. (2009). Temperature sensitivity of cardiac function in pelagic fishes with different vertical mobilities: yellowfin tuna (*Thunnus albacares*), bigeye tuna (*Thunnus obesus*), mahimahi (*Coryphaena hippurus*), and swordfish (*Xiphias gladius*). *Physiol. Biochem. Zool.* **82**, 280-290.
- Gamperl, A. K., Pinder, A. W., Grant, R. R. and Boutilier, R. G. (1994). Influence of hypoxia and adrenaline administration on coronary blood flow and cardiac performance in seawater rainbow trout (*Oncorhynchus mykiss*). *J. Exp. Biol.* **193**, 209-232.
- Gauthier, C., Sèze-Goismier, C. and Rozec, B. (2007). Beta 3-adrenoceptors in the cardiovascular system. *Clin. Hemorheol. Microcirc.* **37**, 193-204.
- Godø, O. R. and Michalsen, K. (2000). Migratory behavior of north-east Arctic cod, studied by use of data storage tags. *Fish. Res.* **48**, 127-140.
- Gollock, M. J., Currie, S., Petersen, L. H. and Gamperl, A. K. (2006). Cardiovascular and haematological responses of Atlantic cod (*Gadus morhua*) to acute temperature increase. *J. Exp. Biol.* **209**, 2961-2970.
- Graham, M. S. and Farrell, A. P. (1985). The seasonal intrinsic cardiac performance of a marine teleost. *J. Exp. Biol.* **118**, 173-183.
- Graham, M. S. and Farrell, A. P. (1989). Effect of temperature acclimation on cardiac performance of a perfused trout heart. *Physiol. Zool.* **62**, 38-61.
- Hanson, L. M., Obradovich, S., Mouniargi, J. and Farrell, A. P. (2006). The role of adrenergic stimulation in maintaining maximum cardiac performance in rainbow trout (*Oncorhynchus mykiss*) during hypoxia, hyperkalemia and acidosis at 10°C. *J. Exp. Biol.* **209**, 2442-2451.
- Haverinen, J. and Vornanen, M. (2004). Temperature acclimation modifies Na<sup>+</sup> current in fish cardiac myocytes. *J. Exp. Biol.* **207**, 2823-2833.
- Haverinen, J. and Vornanen, M. (2008). Responses of action potential and K<sup>+</sup> currents to temperature acclimation in fish hearts: phylogeny of thermal preference. *Physiol. Biochem. Zool.* **82**, 468-482.
- Imbrogno, S., De Iuri, L., Mazza, R. and Tota, B. (2001). Nitric oxide modulates cardiac performance in the heart of *Anguilla anguilla*. *J. Exp. Biol.* **204**, 1719-1727.
- Imbrogno, S., Angelone, T., Adamo, C., Pulerà, E., Tota, B. and Cerra, M. C. (2006). Beta3-Adrenoceptors in the eel (*Anguilla anguilla*) heart: negative inotropy and NO-cGMP-dependent mechanism. *J. Exp. Biol.* **209**, 4966-4973.
- Keen, J. E., Vianzon, D. M., Farrell, A. P. and Tibbits, G. F. (1993). Thermal acclimation alters both adrenergic sensitivity and adrenoceptor density in cardiac tissue of rainbow trout. *J. Exp. Biol.* **181**, 27-47.
- Lague, S. L., Speers-Roesch, B., Richards, J. G. and Farrell, A. P. (2012). Exceptional cardiac anoxia tolerance in tilapia (*Oreochromis hybrid*). *J. Exp. Biol.* **215**, 1354-1365.
- Laurent, P., Holmgren, S. and Nilsson, S. (1983). Nervous and humoral control of the fish heart: structure and function. *Comp. Biochem. Physiol.* **76**, 525-542.
- Lear, W. H. (1984). Discrimination of the stock complex of Atlantic cod (*Gadus morhua*) off southern Labrador and eastern Newfoundland, as inferred from tagging studies. *J. Northw. Atl. Fish. Sci.* **5**, 143-149.
- Lurman, G. J., Bock, C. H. and Poertner, H. O. (2009). Thermal acclimation to 4 or 10 degrees C imparts minimal benefit on swimming performance in Atlantic cod (*Gadus morhua* L.). *J. Comp. Physiol. B* **179**, 623-633.
- Matikainen, N. and Vornanen, M. (1992). Effect of season and temperature acclimation on the function of crucian carp (*Carassius carassius*) heart. *J. Exp. Biol.* **167**, 203-220.
- Mendonça, P. C. and Gamperl, A. K. (2009). Nervous and humoral control of cardiac performance in the winter flounder (*Pleuronectes americanus*). *J. Exp. Biol.* **212**, 934-944.
- Mendonça, P. C., Genge, A. G., Deitch, E. J. and Gamperl, A. K. (2007). Mechanisms responsible for the enhanced pumping capacity of the *in situ* winter flounder heart (*Pseudopleuronectes americanus*). *Am. J. Physiol.* **293**, R2112-R2119.
- Nickerson, J. G., Dugan, S. G., Drouin, G., Perry, S. F. and Moon, T. M. (2003). Activity of the unique  $\beta$ -adrenergic Na<sup>+</sup>/H<sup>+</sup> exchanger in trout erythrocytes is controlled by a novel  $\beta_3$ -AR subtype. *Am. J. Physiol.* **285**, R526-R535.
- Nikinmaa, M. (2003).  $\beta_3$ -adrenergic receptor studies on rainbow trout reveal ancient evolutionary origins and functions distinct from the thermogenic response. *Am. J. Physiol.* **285**, R515-R516.
- Petersen, L. H. and Gamperl, A. K. (2010). Effect of acute and chronic hypoxia on the swimming performance, metabolic capacity and cardiac function of Atlantic cod (*Gadus morhua*). *J. Exp. Biol.* **213**, 808-819.
- Pettersson, K. and Nilsson, S. (1980). Drug induced changes in cardio-vascular parameters in Atlantic cod *Gadus morhua*. *J. Comp. Physiol. B* **137**, 131-138.
- Pörtner, H. O. (2001). Climate change and temperature-dependent biogeography: oxygen limitation of thermal tolerance in animals. *Naturwissenschaften* **88**, 137-146.
- Pörtner, H. O. (2002). Climate variations and the physiological basis of temperature dependent biogeography: systemic to molecular hierarchy of thermal tolerance in animals. *Comp. Biochem. Physiol.* **132A**, 739-761.
- Pörtner, H. O. (2010). Oxygen- and capacity-limitation of thermal tolerance: a matrix for integrating climate-related stressor effects in marine ecosystems. *J. Exp. Biol.* **213**, 881-893.
- Pörtner, H. O. and Knust, R. (2007). Climate change affects marine fishes through the oxygen limitation of thermal tolerance. *Science* **315**, 95-97.
- Pörtner, H. O., Bernal, B., Blust, R., Brix, O., Colosimo, A., De Wachter, B., Giuliani, A., Johansen, T., Fischer, T., Knust, R. et al. (2001). Climate induced temperature effects on growth performance, fecundity and recruitment in marine fish: developing a hypothesis for cause and effect relationships in Atlantic cod (*Gadus morhua*) and common eelpout (*Zoarces viviparus*). *Cont. Shelf Res.* **21**, 1975-1997.
- Righton, R. A., Andersen, K. H., Neat, F., Thorsteinsson, V., Steingrund, P., Svedäng, H., Michalsen, K., Hinrichsen, H.-H., Bendall, V., Neuenfeldt, S. et al. (2010). Thermal niche of Atlantic cod *Gadus morhua*: tolerance limits and optima. *Mar. Ecol. Prog. Ser.* **420**, 1-13.
- Sandblom, E. and Axelsson, M. (2006). Adrenergic control of venous capacitance during moderate hypoxia in the rainbow trout (*Oncorhynchus mykiss*): role of neural and circulating catecholamines. *Am. J. Physiol.* **291**, R711-R718.
- Sandblom, E., Farrell, A. P., Altimiras, J., Axelsson, M. and Claireaux, G. (2005). Cardiac preload and venous return in swimming sea bass (*Dicentrarchus labrax* L.). *J. Exp. Biol.* **208**, 1927-1935.
- Seebacher, F., Davison, W., Lowe, C. J. and Franklin, C. E. (2005). A falsification of the thermal specialization paradigm: compensation for elevated temperatures in Antarctic fishes. *Biol. Lett.* **1**, 151-154.
- Sephton, D. and Driedzic, W. R. (1991). Effect of acute and chronic temperature transition on enzymes of cardiac metabolism in white perch (*Morone americana*), yellow perch (*Perca flavescens*) and small mouth bass (*Micropterus dolomieu*). *Can. J. Zool.* **69**, 258-262.
- Sephton, D. H. and Driedzic, W. R. (1995). Low temperature acclimation decreases rates of protein synthesis in rainbow trout (*Oncorhynchus mykiss*) hearts. *Fish Physiol. Biochem.* **14**, 63-69.
- Shiels, H. A., Vornanen, M. and Farrell, A. P. (2003). Acute temperature change modulates the response of I<sub>Ca</sub> to adrenergic stimulation in fish cardiomyocytes. *Physiol. Biochem. Zool.* **76**, 816-824.
- Shiels, H. A., Paajanen, V. and Vornanen, M. (2006). Sarcolemmal ion currents and sarcoplasmic reticulum Ca<sup>2+</sup> content in ventricular myocytes from the cold stenothermic fish, the burbot (*Lota lota*). *J. Exp. Biol.* **209**, 3091-3100.
- Shiels, H. A., Di Maio, A., Thompson, S. and Block, B. A. (2011). Warm fish with cold hearts: thermal plasticity of excitation-contraction coupling in blue fin tuna. *Proc. Biol. Sci.* **278**, 18-27.
- Sokolova, I. M. and Pörtner, H. O. (2003). Metabolic plasticity and critical temperatures for aerobic scope in a eurythermal marine invertebrate (*Littorina saxatilis*, Gastropoda: Littorinidae) from different latitudes. *J. Exp. Biol.* **206**, 195-207.
- Stillman, J. H. (2003). Acclimation capacity underlies susceptibility to climate change. *Science* **301**, 65.
- Sylvestre, E.-L., Lapointe, D., Dutil, J.-D. and Guderley, H. (2007). Thermal sensitivity of metabolic rates and swimming performance in two latitudinally separated populations of cod, *Gadus morhua* L. *J. Comp. Physiol. B* **177**, 447-460.
- Tiitu, V. and Vornanen, M. (2002). Regulation of cardiac contractility in a cold stenothermic fish, the burbot *Lota lota* L. *J. Exp. Biol.* **205**, 1597-1606.
- Tota, B., Amelio, D., Pellegrino, D., Ip, Y. K. and Cerra, M. C. (2005). NO modulation of myocardial performance in fish hearts. *Comp. Biochem. Physiol.* **142A**, 164-177.
- Vornanen, M. (1998). L-type Ca<sup>2+</sup> current in fish cardiac myocytes: effects of thermal acclimation and  $\beta$ -adrenergic stimulation. *J. Exp. Biol.* **201**, 533-547.
- Wahlqvist, I. and Nilsson, S. (1980). Adrenergic control of the cardio-vascular system of the Atlantic cod, *Gadus morhua*, during "stress". *J. Comp. Physiol. B* **137**, 145-150.
- Webber, D. M., Boutilier, R. G. and Kerr, S. R. (1998). Cardiac output as a predictor of metabolic rate in cod *Gadus morhua*. *J. Exp. Biol.* **201**, 2779-2789.
- Zhang, Y., Weaver, L. J. R., Jr, Ibeawuchi, A. and Olson, K. R. (1998). Catecholaminergic regulation of venous function in the rainbow trout. *Am. J. Physiol.* **274**, R1195-R1202.
